# Supplementary material
Source: PubMed Central journal article supplement (PMC6355613)
Supplement: a8e2bca3d6f0ac9d92179334c0f72a89_AAC.01957-18-s0001.pdf [file a8e2bca3d6f0ac9d92179334c0f72a89_AAC.01957-18-s0001.pdf]

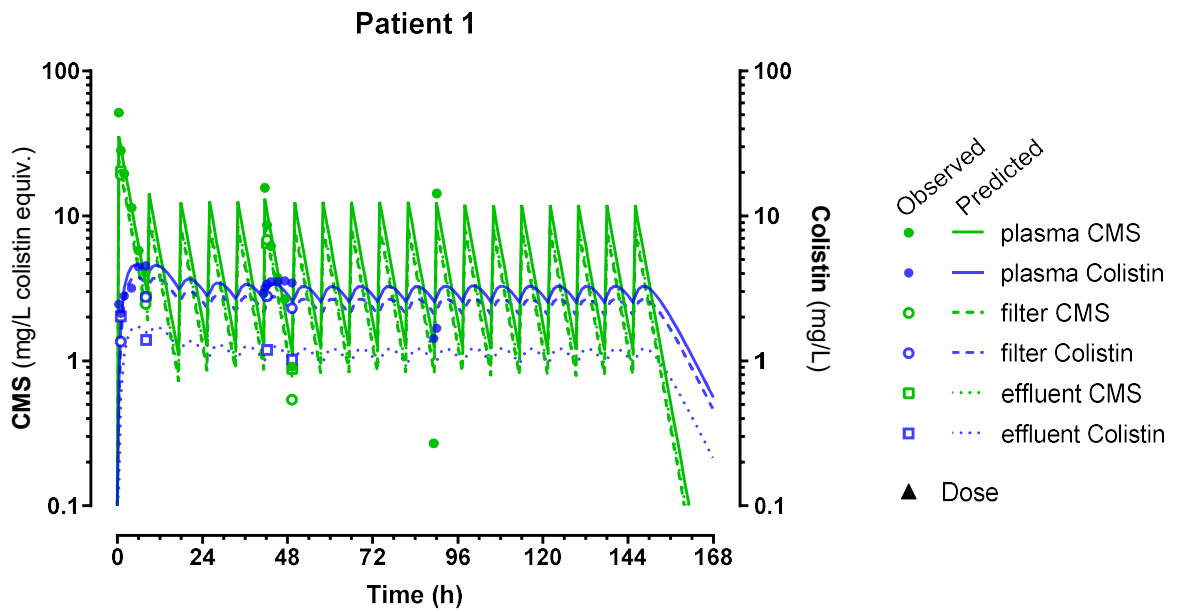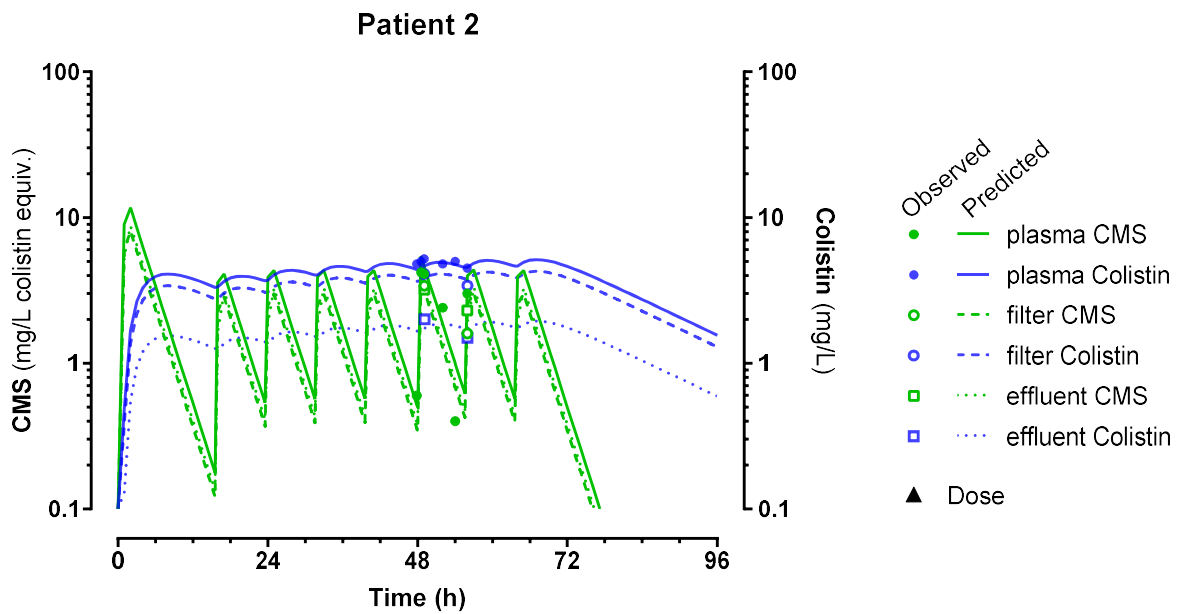

**Fig. S1.1:** Individual curve fitting of patient's observations in logarithmic scale (patients 1, 2)

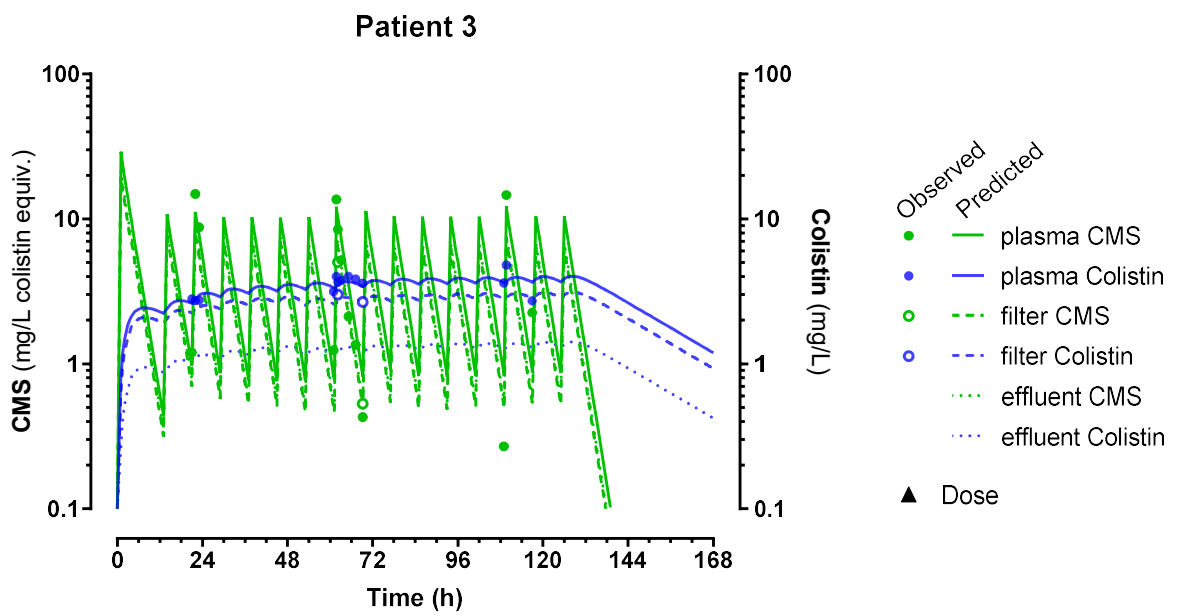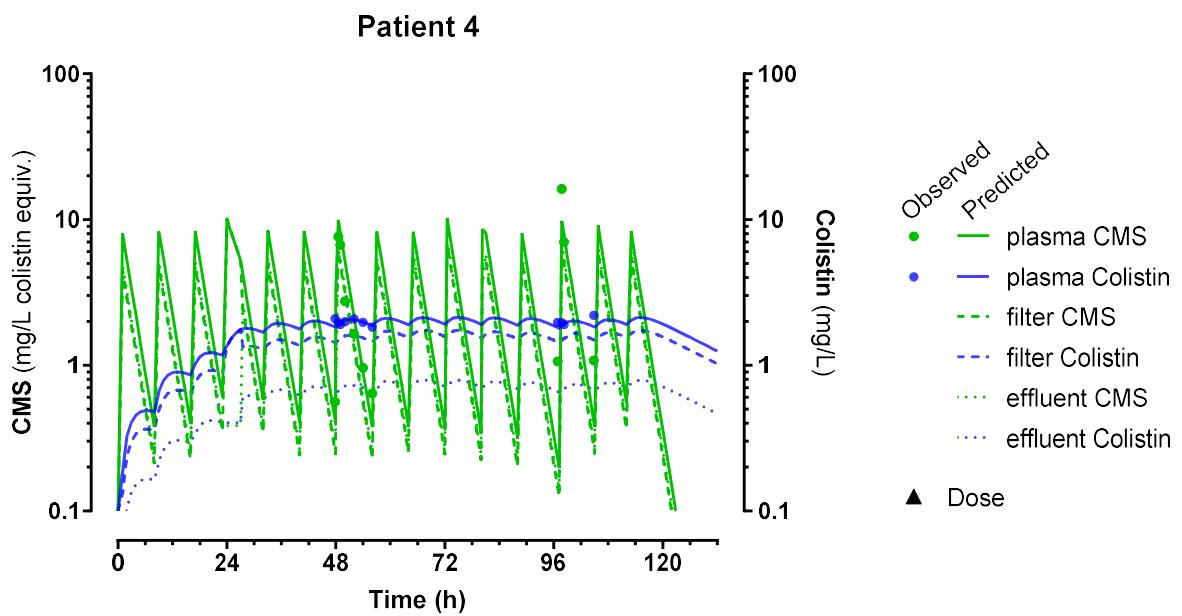

**Fig. S1.2:** Individual curve fitting of patient's observations in logarithmic scale (patients 3, 4)

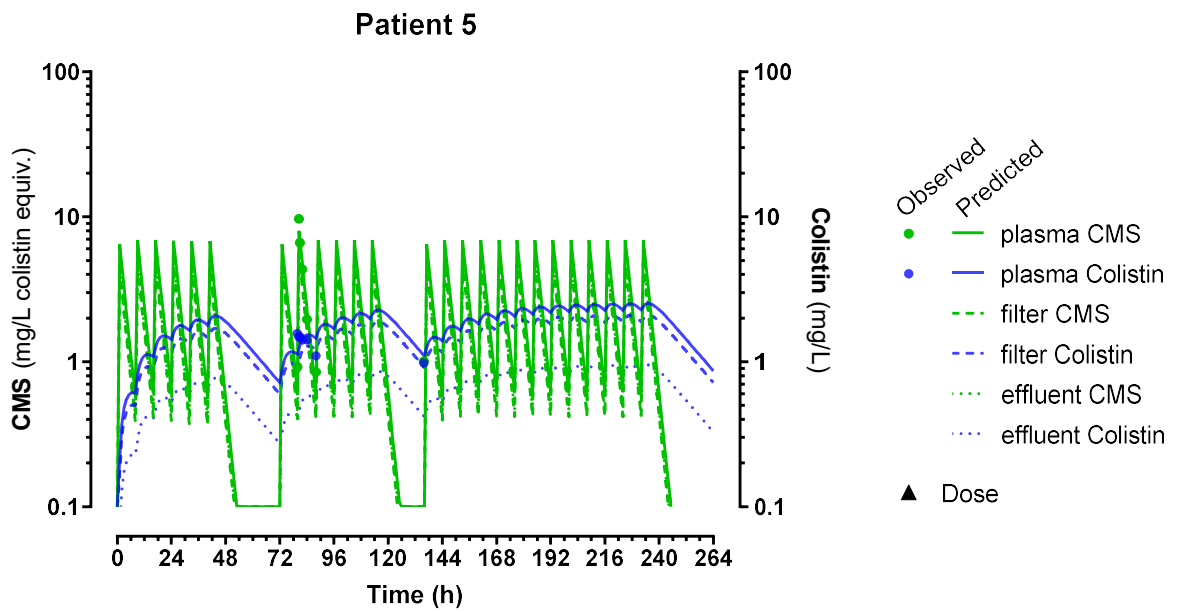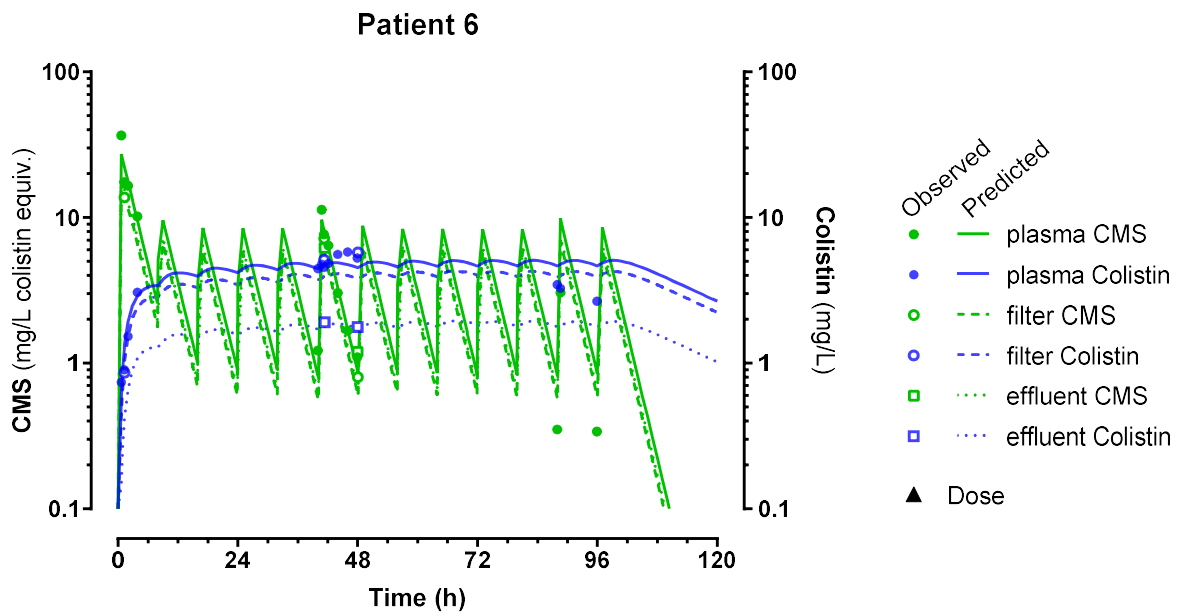

**Fig. S1.3:** Individual curve fitting of patient's observations in logarithmic scale (patients 5, 6)

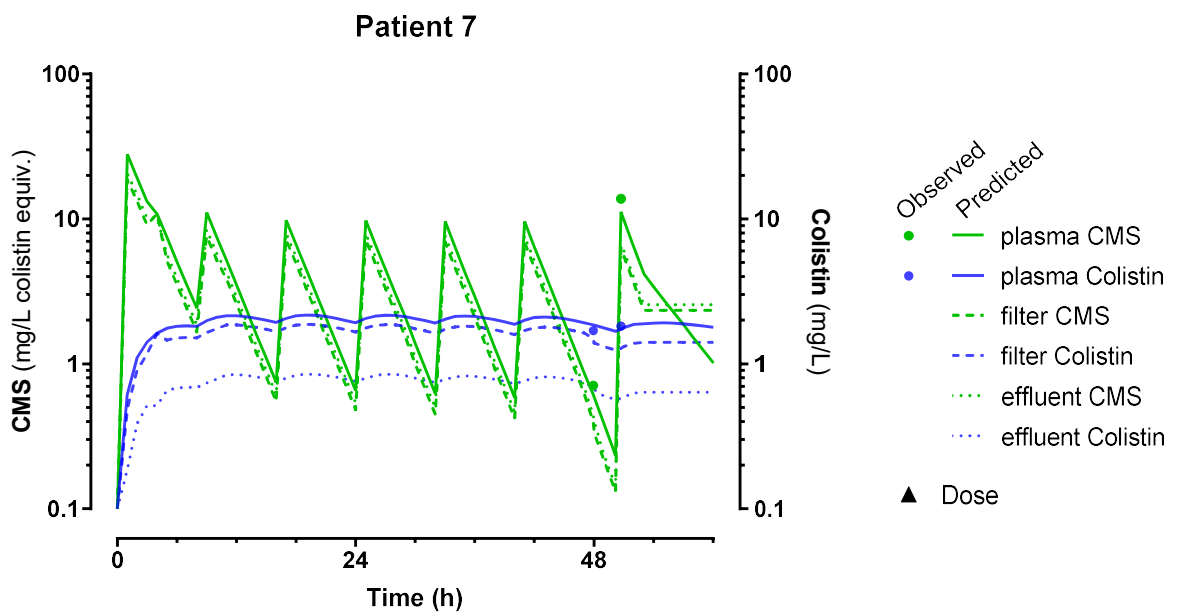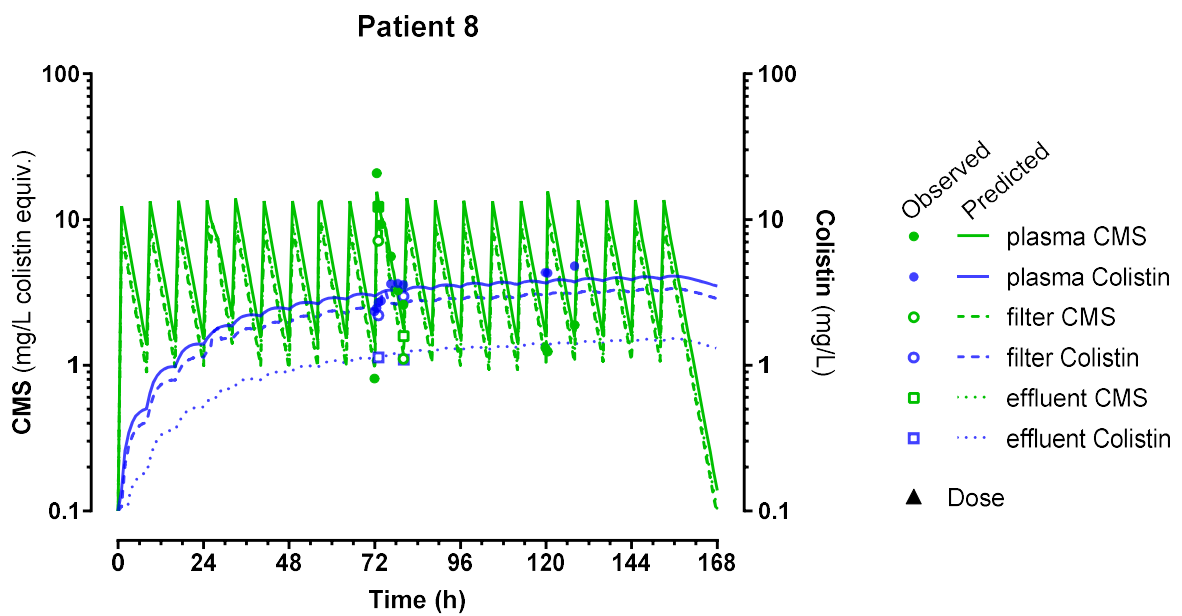

**Fig. S1.4:** Individual curve fitting of patient's observations in logarithmic scale (patients 7, 8)

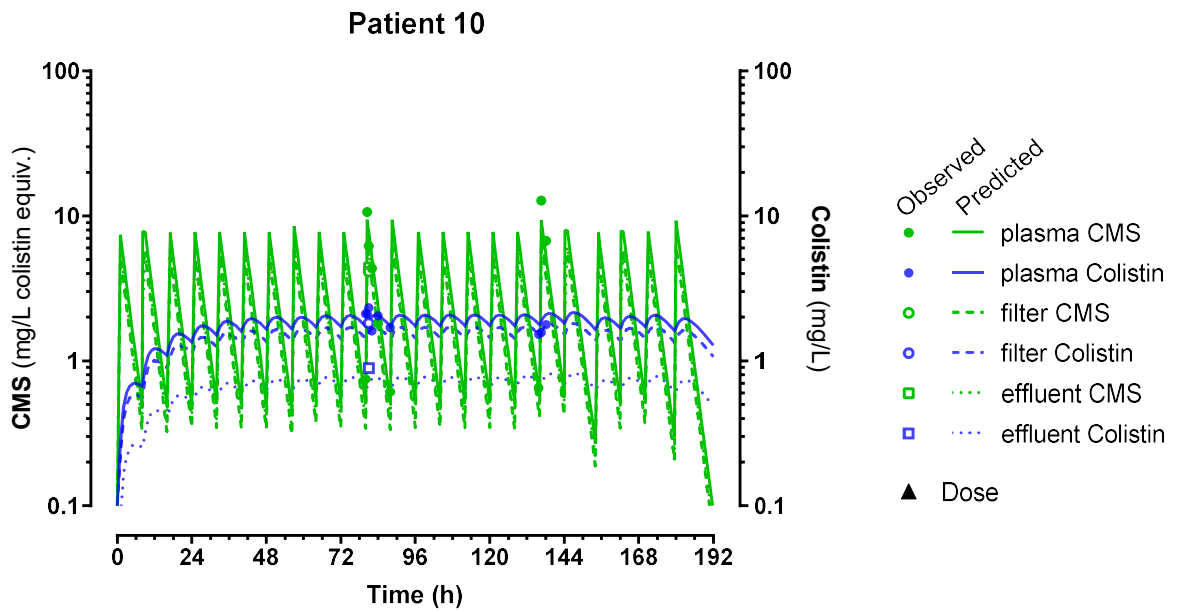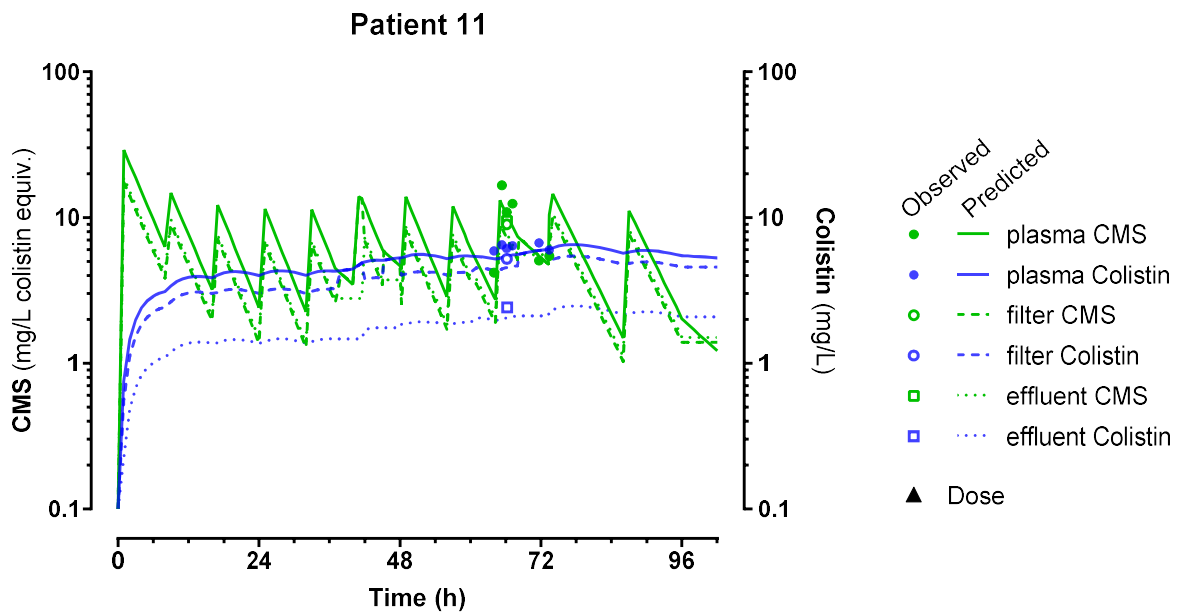

**Fig. S1.5:** Individual curve fitting of patient's observations in logarithmic scale (patients 10, 11)

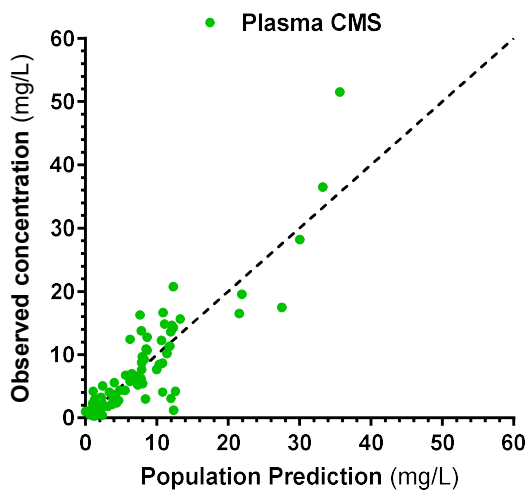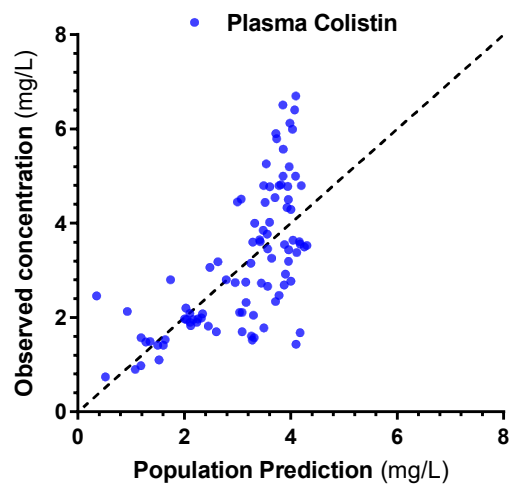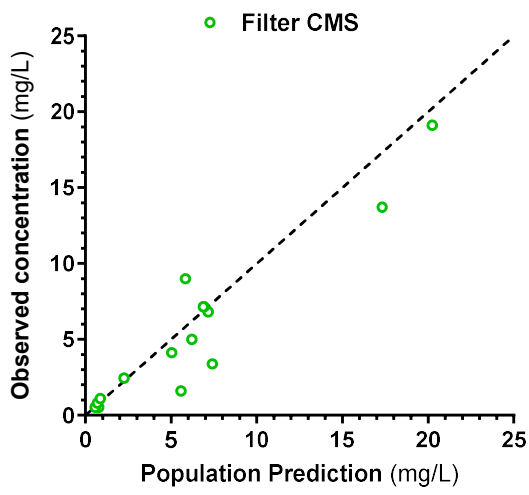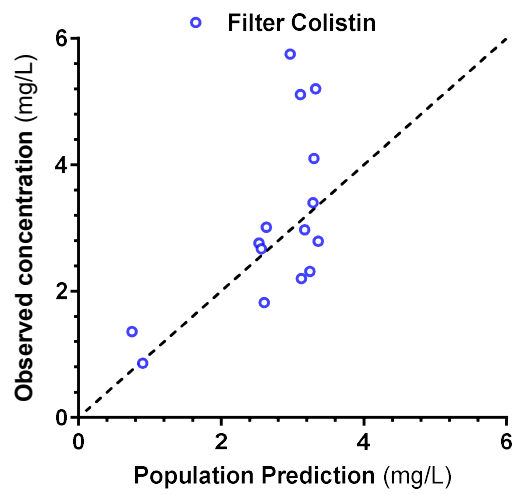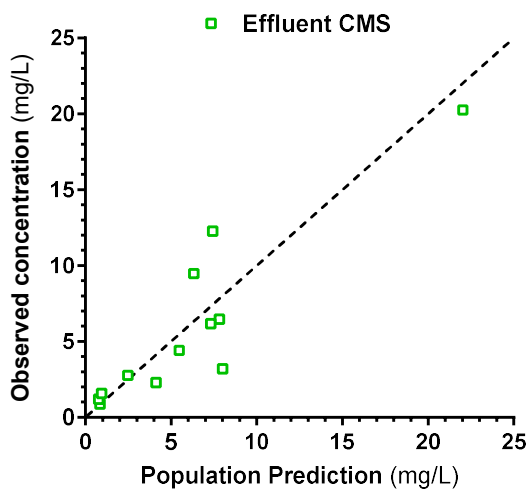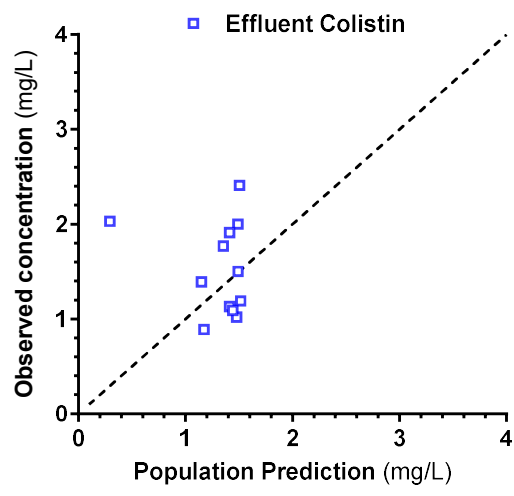

**Fig. S2.1:** Model diagnostic plots, observations *versus* population predictions, in arithmetic scale

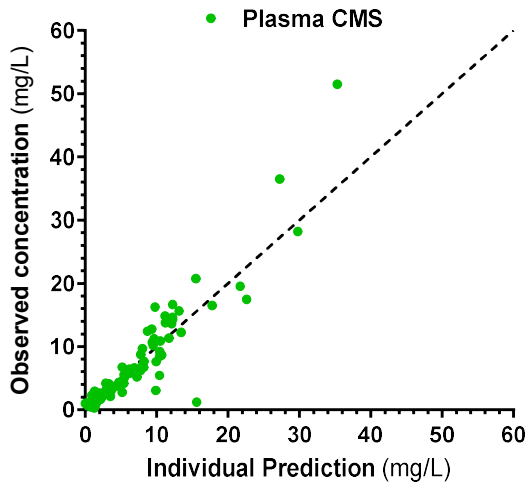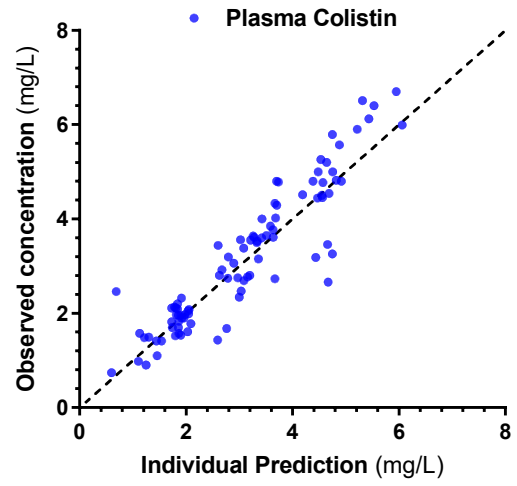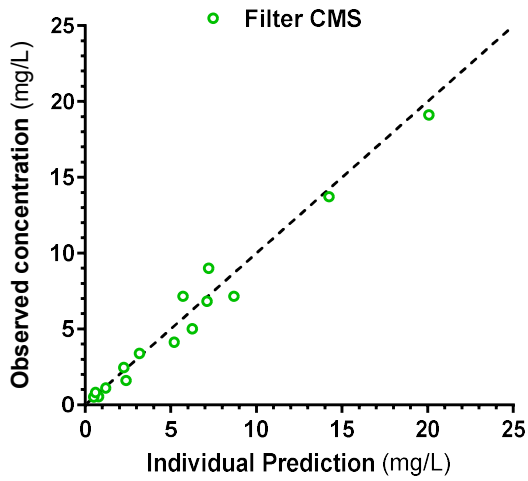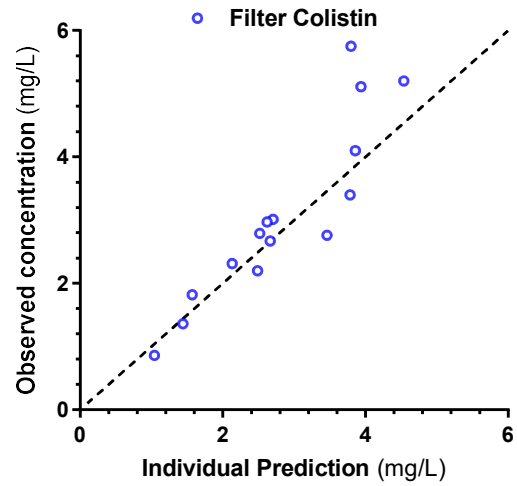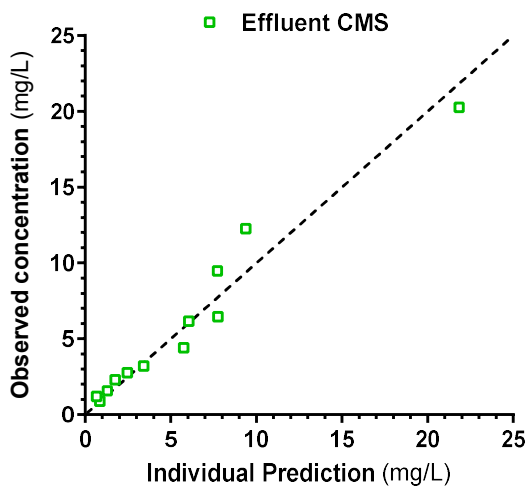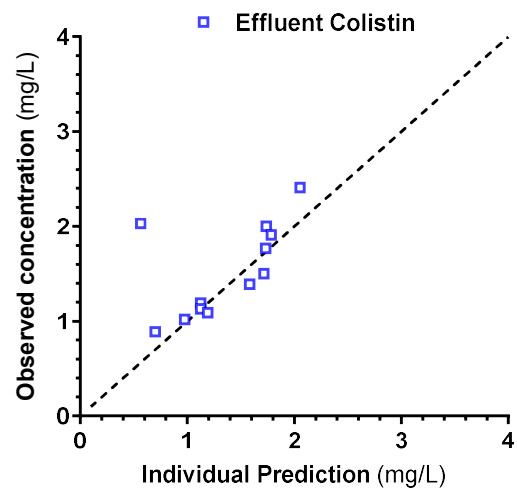

**Fig. S2.2:** Model diagnostic plots, observations *versus* individual predictions, in arithmetic scale

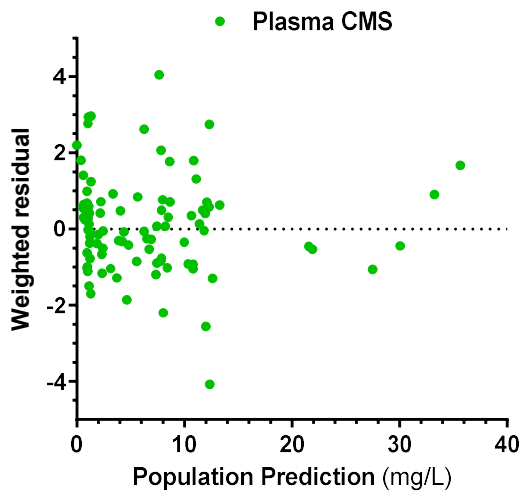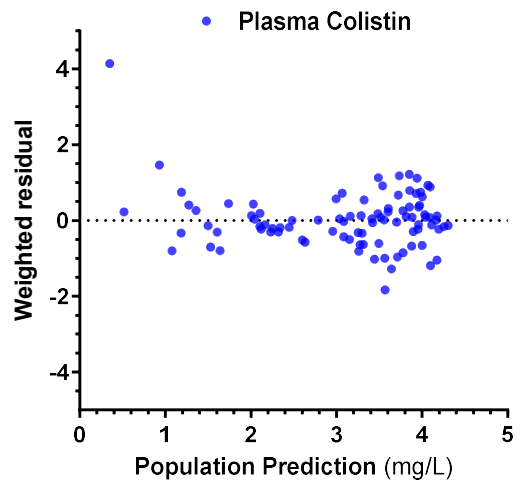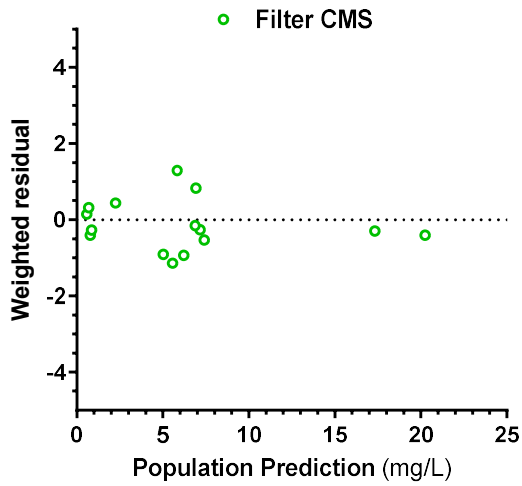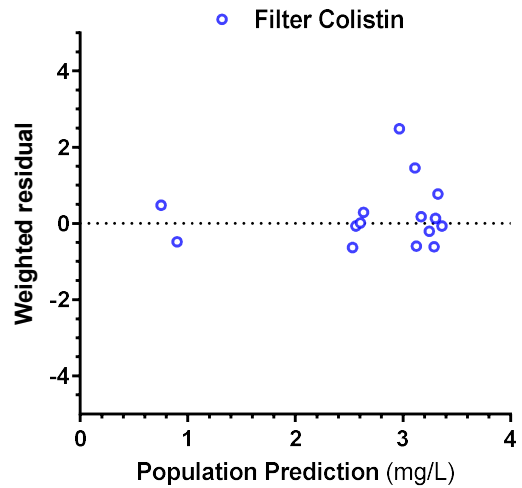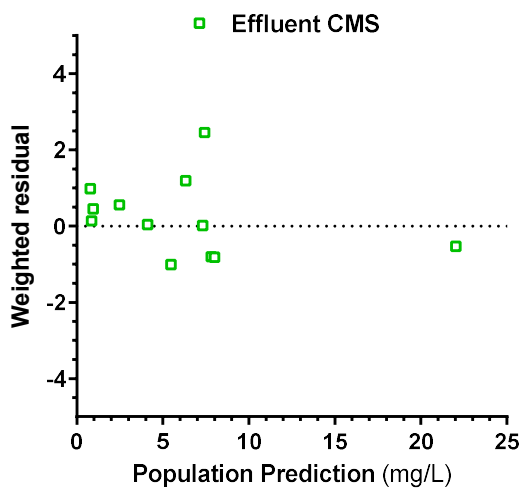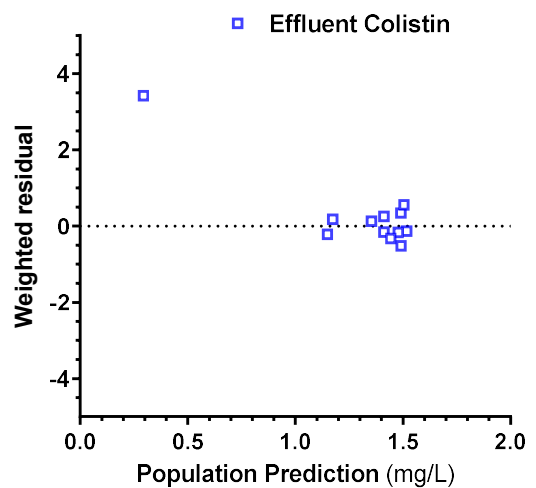

**Fig. S2.3:** Model diagnostic plots, weighted residuals *versus* population predictions, in arithmetic scale



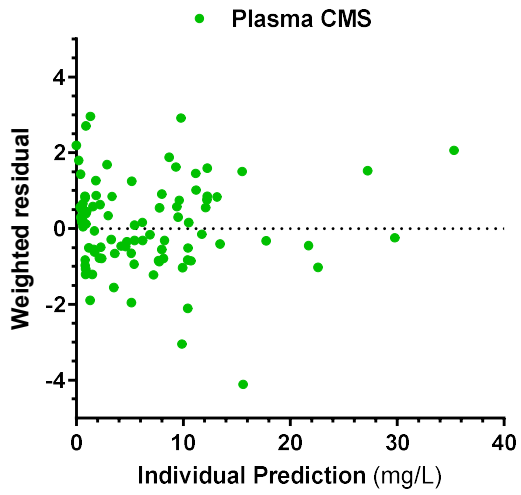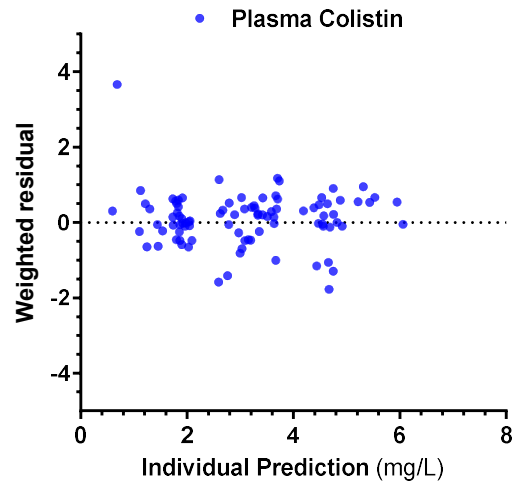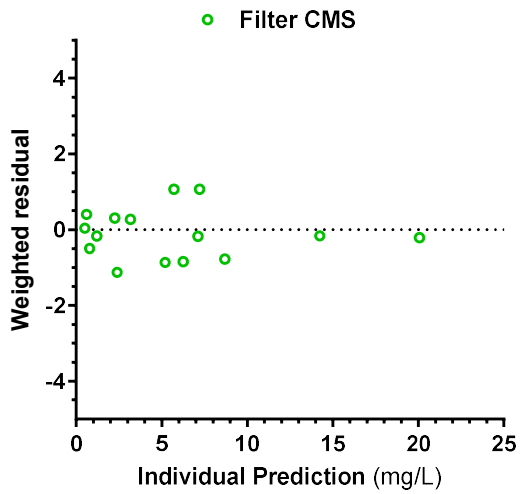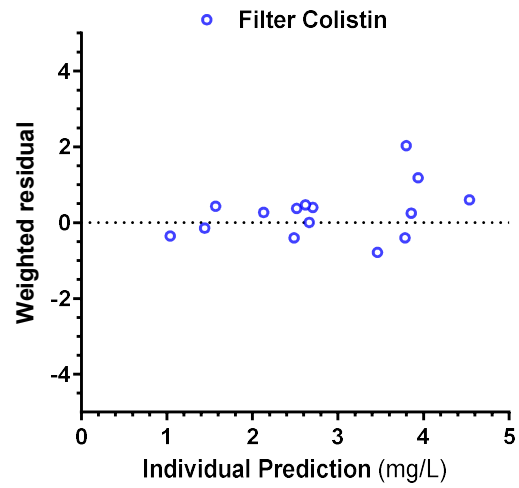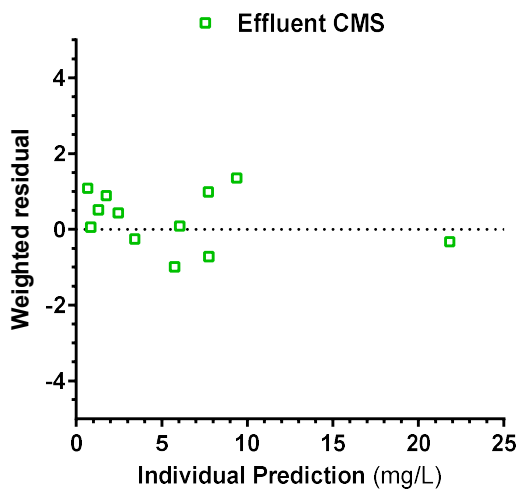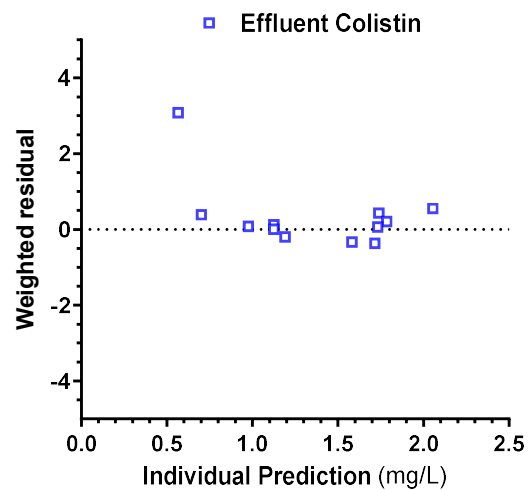

**Fig. S2.4:** Model diagnostic plots, weighted residuals versus individual predictions, in arithmetic scale

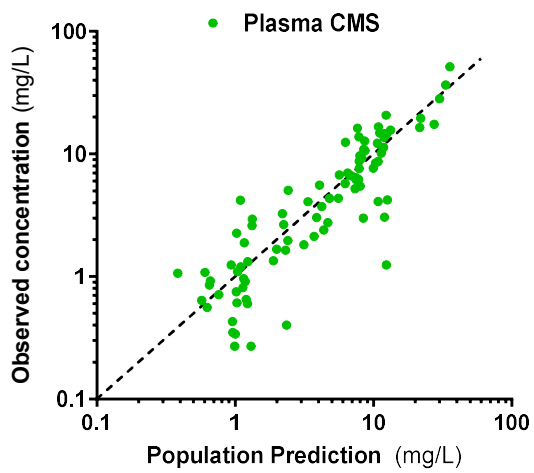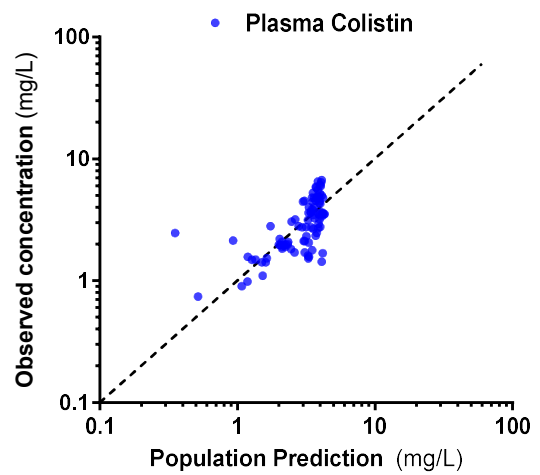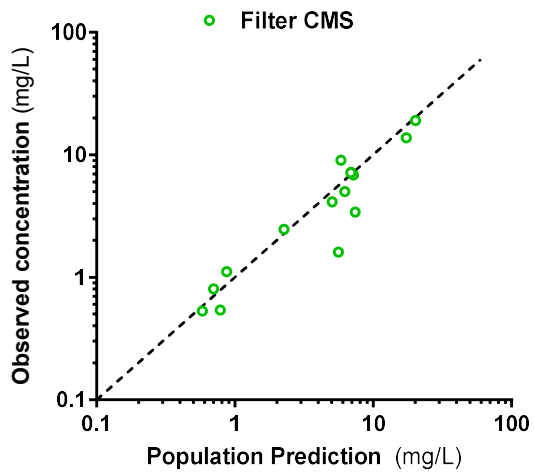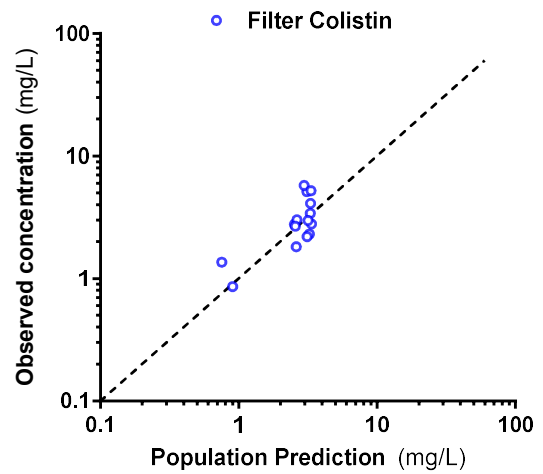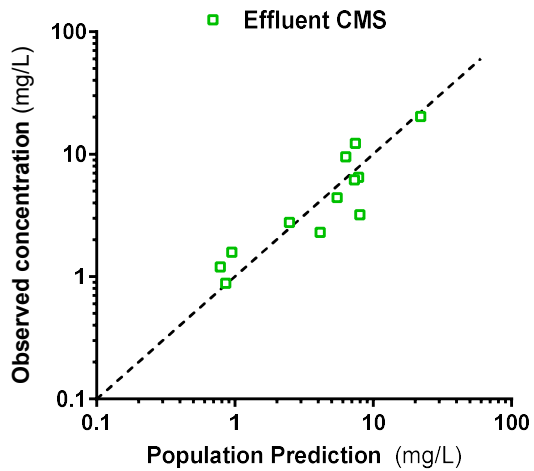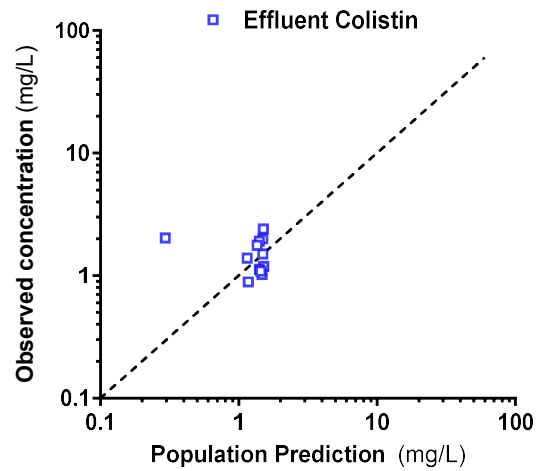

**Fig. S3.1:** Model diagnostic plots, observations versus population predictions, in logarithmic scale

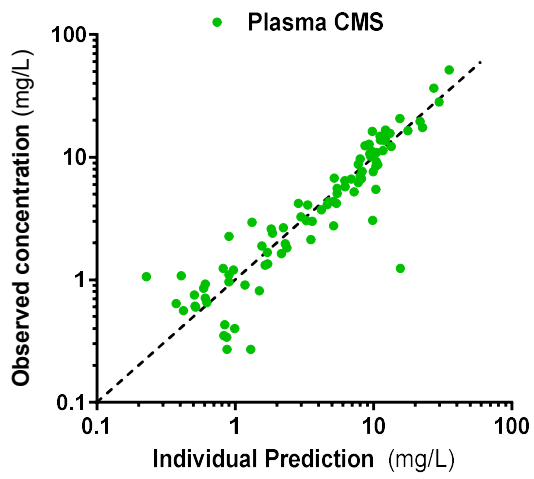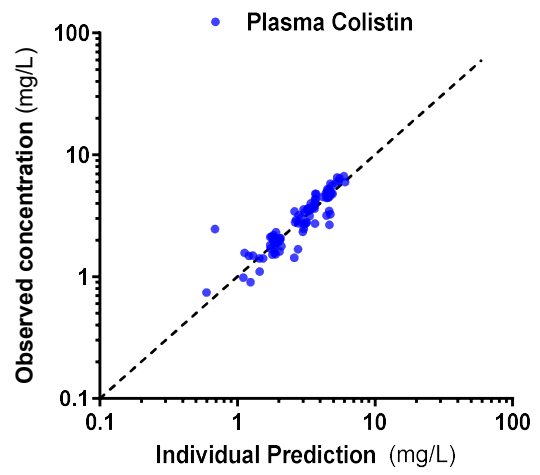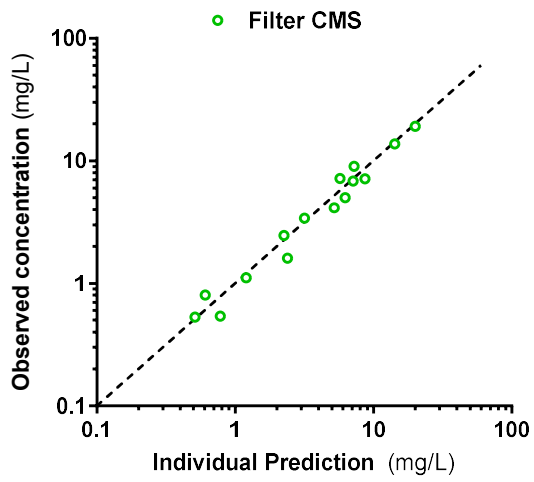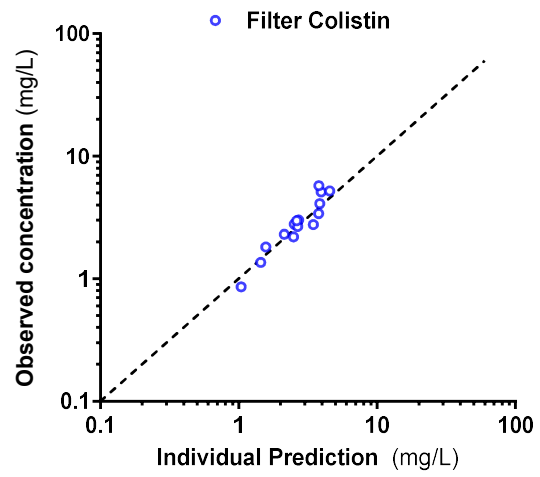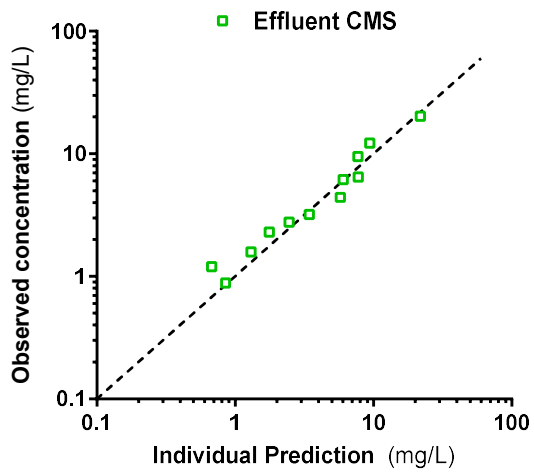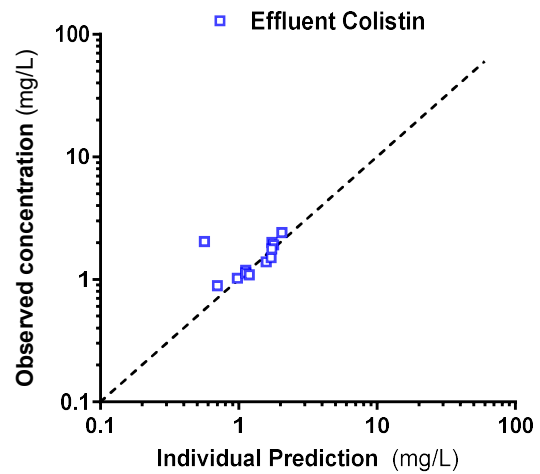

**Fig. S3.2:** Model diagnostic plots, observations versus individual predictions, in logarithmic scale

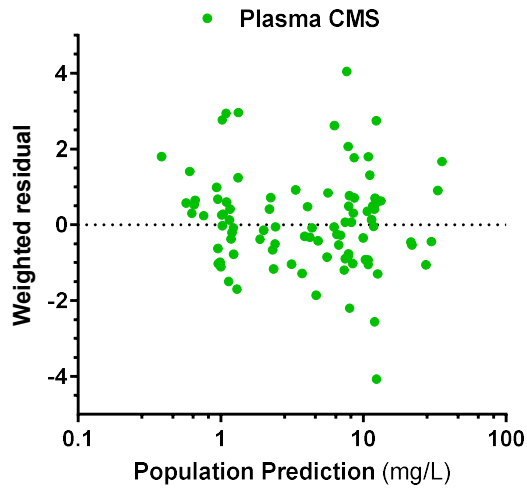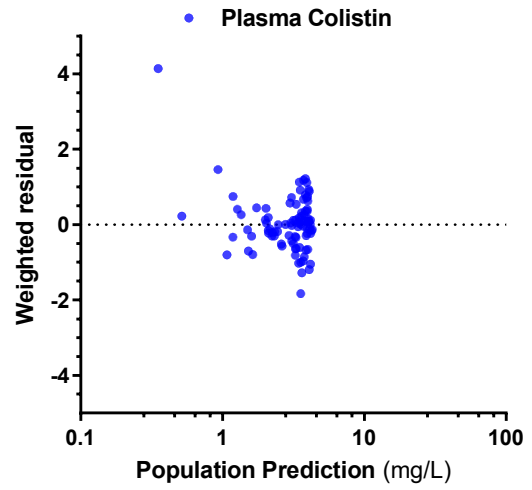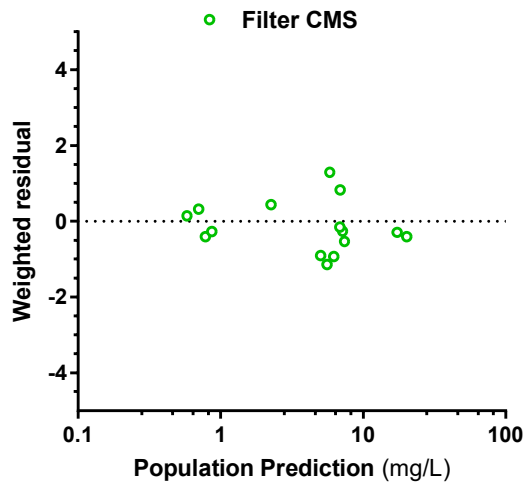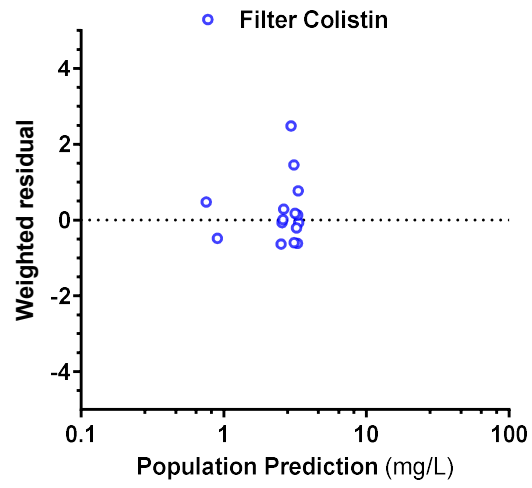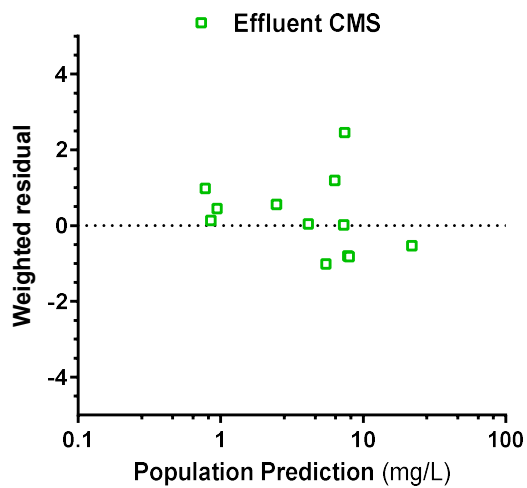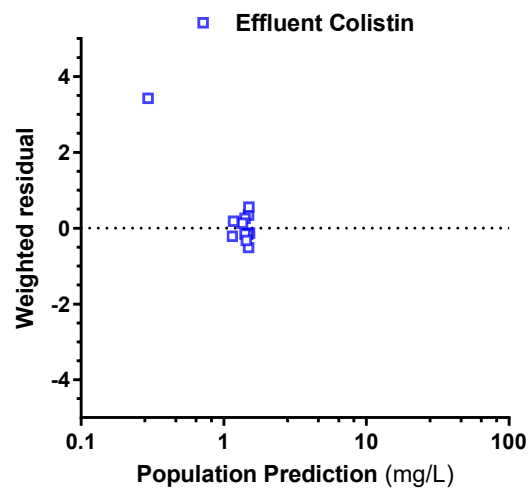

**Fig. S3.3:** Model diagnostic plots, weighted residuals versus population predictions, in logarithmic scale

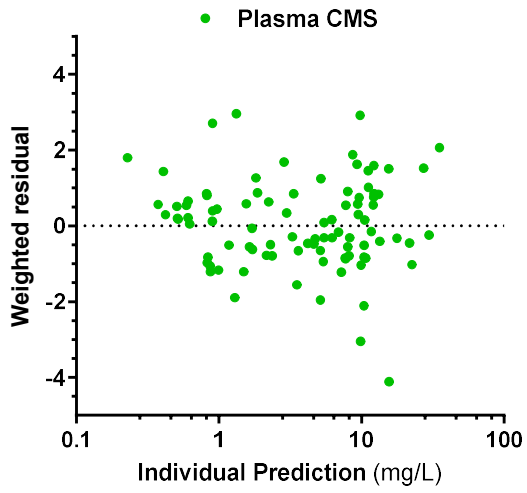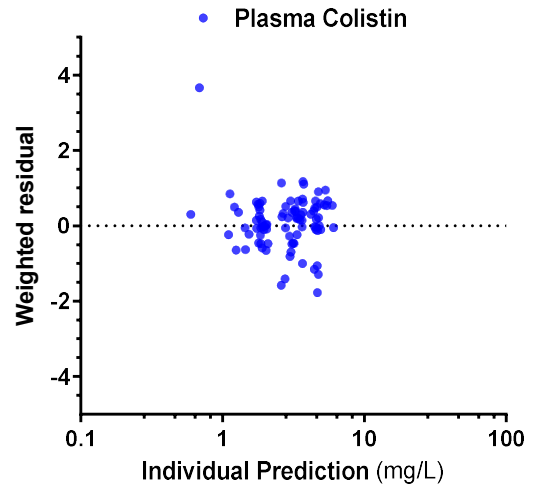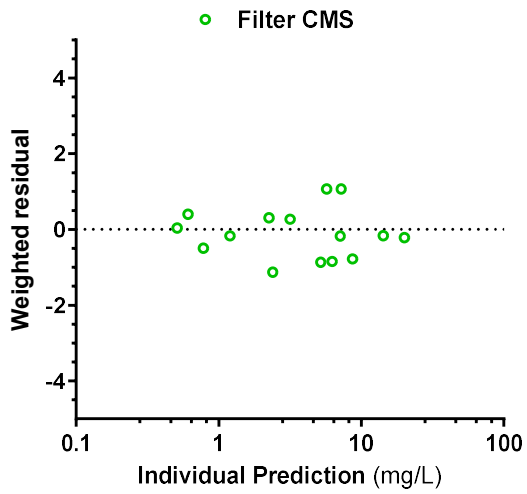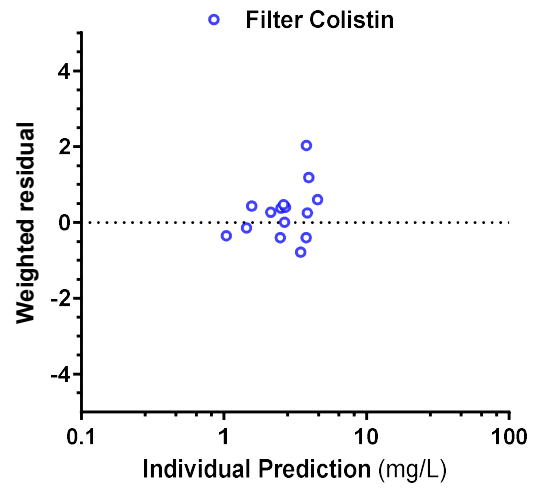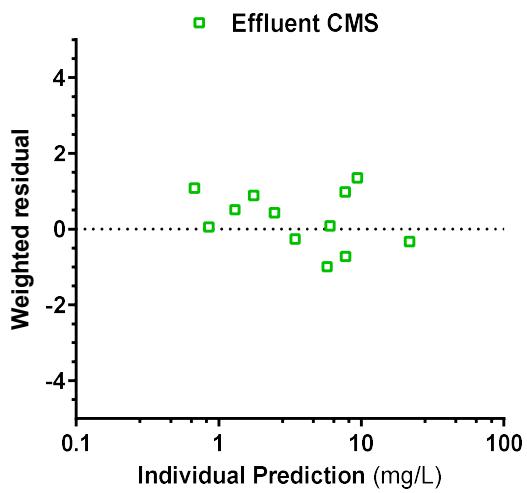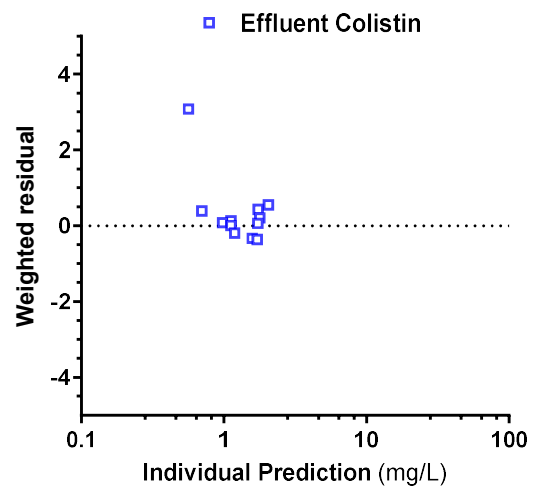

**Fig. S3.4:** Model diagnostic plots, weighted residuals versus individual predictions, in logarithmic scale
